# Supplementary material
Source: HighWire-hosted journal article supplement (https://www.cmajopen.ca/highwire/filestream/85614/field_highwire_adjunct_files/5/2020-0248-6-at.pdf)
Supplement: 2020-0248-6-at.pdf [file 2020-0248-6-at.pdf]

**Supplemental Table S4: GRADE evidence rating: Nutritional interventions compared to usual care for older adults living with frailty or pre-frailty**

| Certainty assessment                                                                                                                                                                               |                   |                      |                          |              |                          |                     | № of patients |            | Effect                                                    | Certainty        | Importance |
|----------------------------------------------------------------------------------------------------------------------------------------------------------------------------------------------------|-------------------|----------------------|--------------------------|--------------|--------------------------|---------------------|---------------|------------|-----------------------------------------------------------|------------------|------------|
| № of studies                                                                                                                                                                                       | Study design      | Risk of bias         | Inconsistency            | Indirectness | Imprecision              | Other consideration | Nutrition     | usual care | Absolute (95% CI)                                         |                  |            |
| <b>1. Physical (follow up: range 4 weeks to 24 weeks; assessed with: Activities of daily living (ADL), Muscle strength (handgrip &amp; non-handgrip), Appendicular Lean mass (ALM))</b>            |                   |                      |                          |              |                          |                     |               |            |                                                           |                  |            |
| 7 <sup>a</sup>                                                                                                                                                                                     | randomised trials | serious <sup>b</sup> | not serious <sup>c</sup> | not serious  | not serious <sup>d</sup> | none                | 373           | 321        | SMD <b>0.16 SD higher</b><br>(0.02 higher to 0.29 higher) | ⊕⊕⊕○<br>MODERATE | CRITICAL   |
| <b>2. Mobility (follow up: range 4 weeks to 24 weeks; assessed with: Performance measures (Gait speed, Timed up &amp; go, chair sit &amp; stand, balance, short physical performance battery))</b> |                   |                      |                          |              |                          |                     |               |            |                                                           |                  |            |
| 7 <sup>a</sup>                                                                                                                                                                                     | randomised trials | serious <sup>b</sup> | not serious <sup>c</sup> | not serious  | not serious              | none                | 373           | 321        | SMD <b>0.15 SD higher</b><br>(0.001 higher to 0.3 higher) | ⊕⊕⊕○<br>MODERATE | CRITICAL   |
| <b>3. Health (follow up: range 12 weeks to 24 weeks; assessed with: Body weight &amp; Body mass index)</b>                                                                                         |                   |                      |                          |              |                          |                     |               |            |                                                           |                  |            |
| 4 <sup>f</sup>                                                                                                                                                                                     | randomised trials | serious <sup>g</sup> | not serious <sup>c</sup> | not serious  | serious <sup>h</sup>     | none                | 150           | 134        | SMD <b>0.18 SD lower</b><br>(0.51 lower to 0.16 higher)   | ⊕⊕○○<br>LOW      | CRITICAL   |
| <b>4. Frailty (follow up: range 12 weeks to 24 weeks; assessed with: Frailty criteria (Cardiovascular Health Study, Korean Longitudinal Study, Modified Fried))</b>                                |                   |                      |                          |              |                          |                     |               |            |                                                           |                  |            |
| 3 <sup>i</sup>                                                                                                                                                                                     | randomised trials | serious <sup>j</sup> | not serious <sup>c</sup> | not serious  | not serious <sup>k</sup> | none                | 155           | 100        | SMD <b>0.22 SD lower</b><br>(0.44 lower to 0.01 lower)    | ⊕⊕⊕○<br>MODERATE | CRITICAL   |

GRADE – Nutrition-only Studies

| Certainty assessment |              |              |               |              |             |                     | № of patients |            | Effect            | Certainty | Importance |
|----------------------|--------------|--------------|---------------|--------------|-------------|---------------------|---------------|------------|-------------------|-----------|------------|
| № of studies         | Study design | Risk of bias | Inconsistency | Indirectness | Imprecision | Other consideration | Nutrition     | usual care | Absolute (95% CI) |           |            |

**5. Diet quality (follow up: range 12 weeks to 24 weeks; assessed with: Kcal / day, MJ / day)**

|                |                   |                      |                      |             |                      |      |     |     |                                                      |                  |          |
|----------------|-------------------|----------------------|----------------------|-------------|----------------------|------|-----|-----|------------------------------------------------------|------------------|----------|
| 5 <sup>1</sup> | randomised trials | serious <sup>m</sup> | serious <sup>n</sup> | not serious | serious <sup>o</sup> | none | 222 | 161 | SMD <b>0.1 SD higher</b> (0.47 lower to 0.67 higher) | ⊕○○○<br>VERY LOW | CRITICAL |
|----------------|-------------------|----------------------|----------------------|-------------|----------------------|------|-----|-----|------------------------------------------------------|------------------|----------|

**6. Quality of life (follow up: mean 24 weeks; assessed with: SF-36 Physical and Mental component score)**

|                |                   |             |             |             |                      |      |     |     |                                                      |                  |          |
|----------------|-------------------|-------------|-------------|-------------|----------------------|------|-----|-----|------------------------------------------------------|------------------|----------|
| 1 <sup>p</sup> | randomised trials | not serious | not serious | not serious | serious <sup>o</sup> | none | 121 | 122 | SMD <b>0.12 SD lower</b> (1.39 lower to 1.15 higher) | ⊕⊕⊕○<br>MODERATE | CRITICAL |
|----------------|-------------------|-------------|-------------|-------------|----------------------|------|-----|-----|------------------------------------------------------|------------------|----------|

CI: Confidence interval; SMD: Standardized mean difference

Note: There was no data in the included studies for the following outcomes; Mortality, Health Service Use, and Social/Caregiver **GRADE – Nutrition-only Studies**

## Explanations

- a. Latham, 2003; Kim, 2012; Tieland, 2012; Pin Ng, 2015; Niccoli, 2017; Park, 2018; Wu, 2018
- b. 2 out of 7 studies rated as unclear risk with concerns regarding incomplete and selective outcome reporting, and other risk of bias (such as baseline imbalance across groups).
- c. The confidence intervals overlap with low statistical heterogeneity observed across studies.
- d. The sample size is adequate ( $\geq 300$ ) in both intervention and control arms and effect estimate is precise (Confidence intervals do not include the no effect value "0").
- e. The confidence intervals overlap with moderate level of statistical heterogeneity observed across studies.
- f. Kim, 2012; Tieland, 2012; Pin Ng, 2015; Wu, 2018
- g. 1 out of 4 studies rated as unclear risk with concerns regarding incomplete and selective outcome reporting, and other risk of bias (such as baseline imbalance across groups).
- h. The sample size is not adequate ( $< 300$ ) in each arm and effect estimate is imprecise with confidence intervals including the no effect value of "0". i. Pin Ng, 2015; Park, 2018; Wu, 2018
- j. 1 out of 3 studies rated as unclear risk with concerns regarding selective outcome reporting and other risk of bias (such as baseline imbalance across groups).
- k. The sample size is not adequate ( $< 300$ ) in each arm, however, effect estimate is precise with confidence intervals not including the no effect value of "0". l. de Jong, 2000; Kim, 2012; Tieland, 2012; Park, 2018; Wu, 2018
- m. 2 out of 5 studies rated as unclear risk with concerns regarding allocation concealment, blinding, incomplete and selective outcome reporting, and other risk of bias (such as baseline imbalance across groups).
- n. The confidence intervals do not overlap with substantial level of statistical heterogeneity observed across studies.
- o. The sample size is not adequate ( $< 300$ ) in each arm and effect estimate is imprecise with confidence intervals including the no effect value of "0". p. Latham, 2003

**Supplemental Table S5: GRADE evidence rating: Protein supplementation interventions compared to usual care for older adults living with frailty or pre-frailty**

| Certainty assessment                                                                                                                                                                               |                   |                      |                          |              |                          |                     | No. of patients |            | Effect                                                    | Certainty        | Importance |
|----------------------------------------------------------------------------------------------------------------------------------------------------------------------------------------------------|-------------------|----------------------|--------------------------|--------------|--------------------------|---------------------|-----------------|------------|-----------------------------------------------------------|------------------|------------|
| No. of studies                                                                                                                                                                                     | Study design      | Risk of bias         | Inconsistency            | Indirectness | Imprecision              | Other consideration | Protein suppl.  | usual care | Absolute (95% CI)                                         |                  |            |
| <b>1. Physical (follow up: range 4 weeks to 24 weeks; assessed with: Activities of daily living (ADL), Muscle strength (handgrip &amp; non-handgrip), Appendicular Lean mass (ALM))</b>            |                   |                      |                          |              |                          |                     |                 |            |                                                           |                  |            |
| 5 <sup>a</sup>                                                                                                                                                                                     | randomised trials | serious <sup>b</sup> | not serious <sup>c</sup> | not serious  | not serious <sup>d</sup> | none                | 195             | 149        | SMD <b>0.16 SD higher</b><br>(0.01 higher to 0.31 higher) | ⊕⊕⊕○<br>MODERATE | CRITICAL   |
| <b>2. Mobility (follow up: range 4 weeks to 24 weeks; assessed with: Performance measures (Gait speed, Timed up &amp; go, chair sit &amp; stand, balance, short physical performance battery))</b> |                   |                      |                          |              |                          |                     |                 |            |                                                           |                  |            |
| 5 <sup>a</sup>                                                                                                                                                                                     | randomised trials | serious <sup>b</sup> | not serious <sup>e</sup> | not serious  | not serious <sup>d</sup> | none                | 195             | 149        | SMD <b>0.2 SD higher</b><br>(0.02 higher to 0.39 higher)  | ⊕⊕⊕○<br>MODERATE | CRITICAL   |
| <b>3. Health (follow up: range 12 weeks to 24 weeks; assessed with: Body weight &amp; Body mass index)</b>                                                                                         |                   |                      |                          |              |                          |                     |                 |            |                                                           |                  |            |
| 3 <sup>f</sup>                                                                                                                                                                                     | randomised trials | serious <sup>g</sup> | not serious <sup>c</sup> | not serious  | serious <sup>h</sup>     | none                | 93              | 84         | SMD <b>0.12 SD lower</b><br>(0.58 lower to 0.34 higher)   | ⊕⊕○○<br>LOW      | CRITICAL   |
| <b>4. Frailty (follow up: mean 12 weeks; assessed with: Frailty criteria (Cardiovascular Health Study, Korean Longitudinal Study, Modified Fried))</b>                                             |                   |                      |                          |              |                          |                     |                 |            |                                                           |                  |            |
| 2 <sup>i</sup>                                                                                                                                                                                     | randomised trials | serious <sup>j</sup> | not serious <sup>c</sup> | not serious  | serious <sup>h</sup>     | none                | 98              | 50         | SMD <b>0.18 SD lower</b><br>(0.45 lower to 0.09 higher)   | ⊕⊕○○<br>LOW      | CRITICAL   |

Appendix 6, as supplied by the authors. Appendix to: Racey M, Ali MU, Sherifali D, et al. Effectiveness of nutrition and combined nutrition and physical activity interventions in older adults with frailty or prefrailty: a systematic review and meta-analysis. *CMAJ Open* 2021. DOI:10.9778/cmajo.20200248. Copyright © 2021 The Author(s) or their employer(s). To receive this resource in an accessible format, please contact us at cmajgroup.cmajca.

GRADE – Nutrition Protein Supplementation Studies

| Certainty assessment                                                                                |                   |                      |                      |              |                      |                     | № of patients  |            | Effect                                                  | Certainty        | Importance |
|-----------------------------------------------------------------------------------------------------|-------------------|----------------------|----------------------|--------------|----------------------|---------------------|----------------|------------|---------------------------------------------------------|------------------|------------|
| № of studies                                                                                        | Study design      | Risk of bias         | Inconsistency        | Indirectness | Imprecision          | Other consideration | Protein suppl. | usual care | Absolute (95% CI)                                       |                  |            |
| <b>5. Diet quality (follow up: range 12 weeks to 24 weeks; assessed with: Kcal / day, MJ / day)</b> |                   |                      |                      |              |                      |                     |                |            |                                                         |                  |            |
| 4 <sup>k</sup>                                                                                      | randomised trials | serious <sup>l</sup> | serious <sup>m</sup> | not serious  | serious <sup>h</sup> | none                | 173            | 124        | SMD <b>0.01 SD lower</b><br>(0.69 lower to 0.67 higher) | ⊕○○○<br>VERY LOW | CRITICAL   |

CI: Confidence interval; SMD: Standardized mean difference

Note: There was no data in the included studies for the following outcomes; Mortality, Quality of Life, Health Service Use, and Social/Caregiver

**Explanations**

- a. Kim, 2012; Tieland, 2012; Niccoli, 2017; Park, 2018; Wu, 2018
- b. 2 out of 5 studies rated as unclear risk with concerns regarding incomplete and selective outcome reporting, and other risk of bias (such as baseline imbalance across groups).
- c. The confidence intervals overlap with low statistical heterogeneity observed across studies.
- d. The sample size is not adequate (<300) in each arm, however, effect estimate is precise with confidence intervals not including the no effect value of "0". e. The confidence intervals overlap with moderate level of statistical heterogeneity observed across studies. f. Kim, 2012; Tieland, 2012; Wu, 2018
- g. 1 out of 3 studies rated as unclear risk with concerns regarding selective outcome reporting and other risk of bias (such as baseline imbalance across groups).
- h. The sample size is not adequate (<300) in each arm and effect estimate is imprecise with confidence intervals including the no effect value of "0". i. Park, 2018; Wu, 2018
- j. 1 out of 2 studies rated as unclear risk with concerns regarding selective outcome reporting and other risk of bias (such as baseline imbalance across groups).
- k. Kim, 2012; Tieland, 2012; Park, 2018; Wu, 2018
- l. 1 out of 4 studies rated as unclear risk with concerns regarding incomplete and selective outcome reporting, and other risk of bias (such as baseline imbalance across groups).
- m. The confidence intervals do not overlap with substantial level of statistical heterogeneity observed across studies.

**Supplemental Table S6: GRADE evidence rating: Combined Approach interventions compared to usual care for older adults living with frailty or pre-frailty**

| Certainty assessment                                                                                                                                                                                |                                      |                      |                          |              |                          |                     | № of patients                 |            | Effect                                                    | Certainty        | Importance |
|-----------------------------------------------------------------------------------------------------------------------------------------------------------------------------------------------------|--------------------------------------|----------------------|--------------------------|--------------|--------------------------|---------------------|-------------------------------|------------|-----------------------------------------------------------|------------------|------------|
| № of studies                                                                                                                                                                                        | Study design                         | Risk of bias         | Inconsistency            | Indirectness | Imprecision              | Other consideration | Nutrition & physical activity | Usual care | Relative / Absolute (95% CI)                              |                  |            |
| <b>1. Physical (follow up: range 12 weeks to 52 weeks; assessed with: Activities of daily living (ADL), Muscle strength (handgrip &amp; non-handgrip), Appendicular Lean mass (ALM))</b>            |                                      |                      |                          |              |                          |                     |                               |            |                                                           |                  |            |
| 6 <sup>a</sup>                                                                                                                                                                                      | randomised and non-randomised trials | serious <sup>b</sup> | not serious <sup>c</sup> | not serious  | not serious <sup>d</sup> | none                | 258                           | 256        | <b>SMD 0.19 SD higher</b><br>(0.06 higher to 0.32 higher) | ⊕⊕⊕○<br>MODERATE | CRITICAL   |
| <b>2. Mobility (follow up: range 12 weeks to 52 weeks; assessed with: Performance measures (Gait speed, Timed up &amp; go, chair sit &amp; stand, balance, short physical performance battery))</b> |                                      |                      |                          |              |                          |                     |                               |            |                                                           |                  |            |
| 6 <sup>a</sup>                                                                                                                                                                                      | randomised and non-randomised trials | serious <sup>b</sup> | not serious <sup>e</sup> | not serious  | not serious <sup>d</sup> | none                | 258                           | 256        | <b>SMD 0.25 SD higher</b><br>(0.02 higher to 0.48 higher) | ⊕⊕⊕○<br>MODERATE | CRITICAL   |
| <b>3. Health (follow up: range 12 weeks to 52 weeks; assessed with: Body weight &amp; Body mass index)</b>                                                                                          |                                      |                      |                          |              |                          |                     |                               |            |                                                           |                  |            |
| 3 <sup>f</sup>                                                                                                                                                                                      | randomised and non-randomised trials | serious <sup>g</sup> | not serious <sup>c</sup> | not serious  | serious <sup>h</sup>     | none                | 158                           | 152        | <b>SMD 0.05 SD lower</b><br>(0.42 lower to 0.33 higher)   | ⊕⊕○○<br>LOW      | CRITICAL   |
| <b>4. Frailty (follow up: range 12 weeks to 52 weeks; assessed with: Modified Fried criteria)</b>                                                                                                   |                                      |                      |                          |              |                          |                     |                               |            |                                                           |                  |            |
| 2 <sup>i</sup>                                                                                                                                                                                      | randomised trials                    | serious <sup>j</sup> | not serious <sup>c</sup> | not serious  | not serious <sup>d</sup> | none                | 100                           | 113        | <b>SMD 0.41 SD lower</b><br>(0.68 lower to 0.14 lower)    | ⊕⊕⊕○<br>MODERATE | CRITICAL   |

GRADE – Combined Approach Studies

| Certainty assessment |              |              |               |              |             |                     | № of patients                 |            | Effect                       |  | Certainty | Importance |
|----------------------|--------------|--------------|---------------|--------------|-------------|---------------------|-------------------------------|------------|------------------------------|--|-----------|------------|
| № of studies         | Study design | Risk of bias | Inconsistency | Indirectness | Imprecision | Other consideration | Nutrition & physical activity | Usual care | Relative / Absolute (95% CI) |  |           |            |

**5. Frailty (follow up: range 12 weeks to 52 weeks; assessed with: Prevalence of frailty at post-intervention)**

|                |                                      |                      |                          |             |                          |      |                  |                  |                                  |                                                       |                  |          |
|----------------|--------------------------------------|----------------------|--------------------------|-------------|--------------------------|------|------------------|------------------|----------------------------------|-------------------------------------------------------|------------------|----------|
| 3 <sup>k</sup> | randomised and non-randomised trials | serious <sup>l</sup> | not serious <sup>c</sup> | not serious | not serious <sup>m</sup> | none | 39 / 174 (22.4%) | 59 / 185 (31.9%) | <b>RR 0.720</b> (0.520 to 0.999) | <b>89 fewer per 1,000</b> (from 153 fewer to 0 fewer) | ⊕⊕⊕○<br>MODERATE | CRITICAL |
|----------------|--------------------------------------|----------------------|--------------------------|-------------|--------------------------|------|------------------|------------------|----------------------------------|-------------------------------------------------------|------------------|----------|

**6. Diet quality (follow up: range 18 weeks to 24 weeks; assessed with: MJ / day)**

|                |                   |                      |                      |             |                      |      |    |    |                                                       |  |                  |          |
|----------------|-------------------|----------------------|----------------------|-------------|----------------------|------|----|----|-------------------------------------------------------|--|------------------|----------|
| 2 <sup>n</sup> | randomised trials | serious <sup>o</sup> | serious <sup>p</sup> | not serious | serious <sup>h</sup> | none | 73 | 68 | <b>SMD 0.53 SD higher</b> (0.98 lower to 2.04 higher) |  | ⊕○○○<br>VERY LOW | CRITICAL |
|----------------|-------------------|----------------------|----------------------|-------------|----------------------|------|----|----|-------------------------------------------------------|--|------------------|----------|

**7. Quality of life (follow up: range 12 weeks to 52 weeks; assessed with: SF-36 Physical & Mental component, EQ5D-VAS, WHOQOL-BREF score)**

|                |                   |                      |                          |             |                      |      |     |     |                                                       |  |             |          |
|----------------|-------------------|----------------------|--------------------------|-------------|----------------------|------|-----|-----|-------------------------------------------------------|--|-------------|----------|
| 3 <sup>q</sup> | randomised trials | serious <sup>l</sup> | not serious <sup>c</sup> | not serious | serious <sup>h</sup> | none | 126 | 141 | <b>SMD 0.31 SD higher</b> (0.05 lower to 0.67 higher) |  | ⊕⊕○○<br>LOW | CRITICAL |
|----------------|-------------------|----------------------|--------------------------|-------------|----------------------|------|-----|-----|-------------------------------------------------------|--|-------------|----------|

CI: Confidence interval; SMD: Standardized mean difference; RR: Risk ratio

Note: There was no data in the included studies for the following outcomes; Mortality, Health Service Use, and Social/Caregiver



**Explanations**

- a. Tieland, 2012; Yamada, 2012; Kwon, 2015; Luger, 2016; Serra-Prat, 2017; Kang, 2019
- b. 4 out of 7 studies rated as unclear risk (2 studies) and high risk (2 studies) with concerns regarding randomization, allocation concealment, blinding, incomplete and selective outcome reporting, and other risk of bias (such as baseline imbalance across groups). c. The confidence intervals overlap with low statistical heterogeneity observed across studies.
- d. The sample size is not adequate (<300) in each arm, however, effect estimate is precise with confidence intervals not including the no effect value of "0".
- e. The confidence intervals overlap with moderate level of statistical heterogeneity observed across studies. f. Tieland, 2012; Serra-Prat, 2017; Kang, 2019
- g. 1 out of 3 studies rated as high risk with concerns regarding randomization, allocation concealment, blinding, incomplete and selective outcome reporting, and other risk of bias (such as baseline imbalance across groups).
- h. The sample size is not adequate (<300) in each arm and effect estimate is imprecise with confidence intervals including the no effect value of "0". i. Luger, 2016; Serra-Prat, 2017
- j. 1 out of 2 studies rated as unclear risk with concerns regarding blinding and other risk of bias (such as baseline imbalance across groups).
- k. Nykänen, 2012, Luger, 2016; Serra-Prat, 2017
- l. 2 out of 3 studies rated as unclear risk with concerns regarding blinding and other risk of bias (such as baseline imbalance across groups).
- m. The sample size is not adequate (<300) in each arm, however, effect estimate is precise with confidence intervals not including the no effect value of "1"
- n. de Jong, 2000; Tieland, 2012
- o. 1 out of 2 studies rated as unclear risk with concerns regarding blinding and other risk of bias (such as baseline imbalance across groups).
- p. The confidence intervals do not overlap with substantial level of statistical heterogeneity observed across studies. q. Kwon, 2015; Luger, 2016; Serra-Prat, 2017
